# Supplementary material for: Identifying the Fe3Mn3O8 phase as a superior catalyst for low-temperature catalytic oxidation of formaldehyde in air
Source: Royal Society of Chemistry journal article supplement (doi:10.1039/d1en00923k), 2021-12-29
Supplement: d1en00923k1.pdf [file d1en00923k1.pdf]

## Supporting Informations

### Identifying Fe<sub>3</sub>Mn<sub>3</sub>O<sub>8</sub> Phase as the Superior Catalyst for Low-Temperature Catalytic Oxidation of Formaldehyde in Air

Hanjie Xie<sup>a,b</sup>, Xiaohan Chen<sup>c</sup>, Chenchen Zhang<sup>a,b</sup>, Ziqing Lao<sup>a</sup>, Xiaojing Liu<sup>a,b</sup>, Xiaona Xie<sup>a</sup>, Raphael Semiat<sup>\*a,b</sup>, Ziyi Zhong<sup>\*a</sup>

<sup>a</sup>*Chemical Engineering, Guangdong Technion Israel Institute of Technology (GTIIT), 241 Da Xue Road, Shantou, Guangdong 515063, China*

<sup>b</sup>*Technion-Israel Institute of Technology (IIT), Haifa, Israel 320000*

<sup>c</sup>*Provincial Key Laboratory of Marine Biotechnology, Institute of Marine Science, Shantou University, Shantou, Guangdong 515063, China*

## Experimental section

### 1. Preparation of catalysts

In detail, for the Fe-Mn oxide catalyst, stoichiometric quantities of 3.58 g  $\text{Mn}(\text{NO}_3)_2$  and 8.08 g  $\text{Fe}(\text{NO}_3)_3 \cdot 9\text{H}_2\text{O}$  were dissolved in 20 ml distilled water under vigorous stirring at 30 °C to form a solution with the desired molar ratio of Fe/Mn (1:1). Then, an appropriate amount of citric acid was added to obtain a solution with a molar ratio of citric acid per metal ion of 1.2. After 15 min of constant stirring, the above solution was gradually heated to 80 °C and continuously stirred for 4 h at this temperature to form a gel. The resulting gel was dried at 100 °C for 12 h, and then calcined at 500 °C for 4 h. This preparation method is easy to be scaled up. Ca. 100 g catalyst could be prepared one time using a container with a volume of 2000 ml in the laboratory. Similarly, the samples with various M/Mn ratios were synthesized. In detail, for the Co-Mn oxide catalyst, stoichiometric quantities of 3.58 g  $\text{Mn}(\text{NO}_3)_2$  and 5.82 g  $\text{Co}(\text{NO}_3)_3 \cdot 6\text{H}_2\text{O}$  were used with the desired molar ratio of Co/Mn (1:1). For the Ni-Mn oxide catalyst, stoichiometric quantities of 3.58 g  $\text{Mn}(\text{NO}_3)_2$  and 5.82 g  $\text{Ni}(\text{NO}_3)_3 \cdot 6\text{H}_2\text{O}$  were used with the desired molar ratio of Ni/Mn (1:1).

### 2. Characterization

$\text{H}_2$ -TPR was performed on an AutoChem II 2920 desorption apparatus. The catalyst (0.100 g) was pretreated in He (30 mL min<sup>-1</sup>) at 250 °C for 1 h and then cooled to 80 °C in He. The sample was then exposed to 10 vol%  $\text{H}_2/\text{Ar}$  (30 mL min<sup>-1</sup>), and the temperature was raised to 900 °C at a rate of 10 °C min<sup>-1</sup>. The oxygen storage capacities of the catalysts were evaluated by the  $\text{O}_2$  temperature-programmed desorption ( $\text{O}_2$ -TPD) method on an AMI-300 desorption apparatus. In brief, 50 mg of catalyst was pretreated under an  $\text{O}_2$  atmosphere (30 cm<sup>3</sup>/min) at 120 °C for 60 min and cooled down to 30 °C at the same condition. Then, the pretreated catalyst was heated from 30 to 900 °C in a He flow (30 cm<sup>3</sup>/min) at a heating rate of 10 °C/min.<sup>28</sup> Electron paramagnetic resonance (EPR) analyses were performed on an EMXplus spectrometer (Bruker, Germany). Before the test, 3 mg of sample was dispersed in 6

ml of methanol, and the dispersion was added into methanol with 60 mM of DMPO. The sample was tested after shaking up. The operating parameters were as follows: modulation frequency: 100.00 KHz; modulation amplitude: 2.00 G; sweep width: 100.00 G; conversion: 40.000 ms; time constant: 40.960 ms; microwave power: 20.00 mW; microwave frequency: 9.84 GHz; and sweep time: 60.70 s.

Co-Mn) in catalytic oxidation of formaldehyde at 25 °C. (Conditions: Catalyst: 0.100 g, HCHO: 115 ppm, GHSV: 300 L g<sup>-1</sup> h<sup>-1</sup>).

| <b>Binary Oxides Catalysts</b> | <b>Specific activity (mg<sub>HCHO</sub> g<sup>-1</sup><sub>cat</sub> h<sup>-1</sup>) at 25 °C</b> |
|--------------------------------|---------------------------------------------------------------------------------------------------|
| <b>Fe-Mn(3:1)</b>              | <b>8.90</b>                                                                                       |
| <b>Fe-Mn(1:1)</b>              | <b>58.0</b>                                                                                       |
| <b>Fe-Mn(1:3)</b>              | <b>37.0</b>                                                                                       |
| <b>Ni-Mn(3:1)</b>              | <b>12.0</b>                                                                                       |
| <b>Ni-Mn(1:1)</b>              | <b>23.0</b>                                                                                       |
| <b>Ni-Mn(1:3)</b>              | <b>33.0</b>                                                                                       |
| <b>Co-Mn(3:1)</b>              | <b>25.0</b>                                                                                       |
| <b>Co-Mn(1:1)</b>              | <b>26.0</b>                                                                                       |
| <b>Co-Mn(1:3)</b>              | <b>33.0</b>                                                                                       |

Table S2. Comparison of HCHO catalytic oxidation performance of Fe-Mn(1:1) with other catalysts reported in literature.

| Catalysts                                | HCHO concentrations | GHSV                                   | Conversion | T (°C) | Ref.      |
|------------------------------------------|---------------------|----------------------------------------|------------|--------|-----------|
| K- $\delta$ -MnO <sub>2</sub>            | 10.0 ppm            | 130 L g <sup>-1</sup> h <sup>-1</sup>  | 100%       | 25     | 1         |
| Pd/TiO <sub>2</sub>                      | 50.0 ppm            | 24.0 L g <sup>-1</sup> h <sup>-1</sup> | 100%       | 30     | 2         |
| 3D-MnO <sub>2</sub>                      | 100 ppm             | 180 L g <sup>-1</sup> h <sup>-1</sup>  | 100%       | 90     | 3         |
| Fe-Mn(1:1)                               | 115 ppm             | 300 L g <sup>-1</sup> h <sup>-1</sup>  | 100%       | 25     | This work |
| Pt/MnO <sub>2</sub> -Ni(OH) <sub>2</sub> | 200 ppm             | Static state                           | 90%        | 25     | 4         |

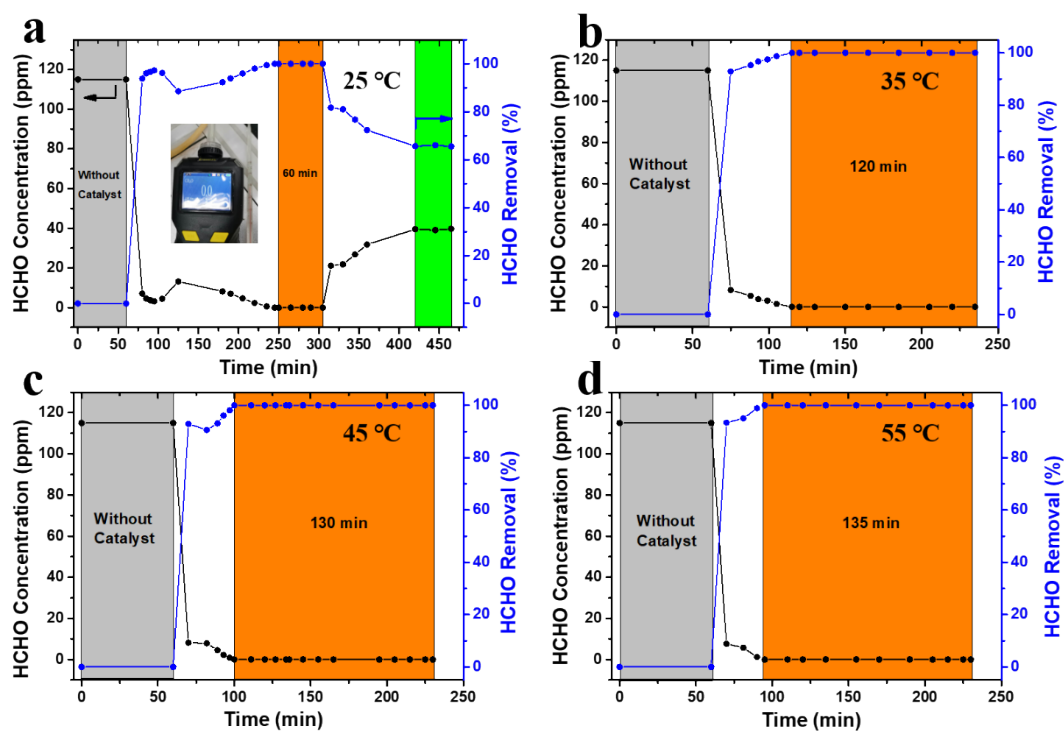

Fig. S1. Formaldehyde removal as a function of reaction time at different temperatures

over the Fe-Mn (1:1) mixed oxide catalyst at a GSHV of 300 L g<sup>-1</sup> h<sup>-1</sup>, (a) 25 °C, (b) 35 °C, (c) 45 °C, and (d) 55 °C.

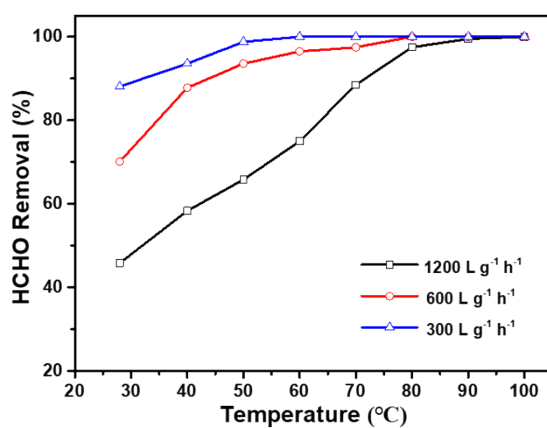

Fig. S2. Effect of GHSV on the catalytic performance of the Fe-Mn (1:1) oxide catalyst (catalyst: 25-100 mg, and HCHO concentration: 115 ppm, Temperature: 25 °C).

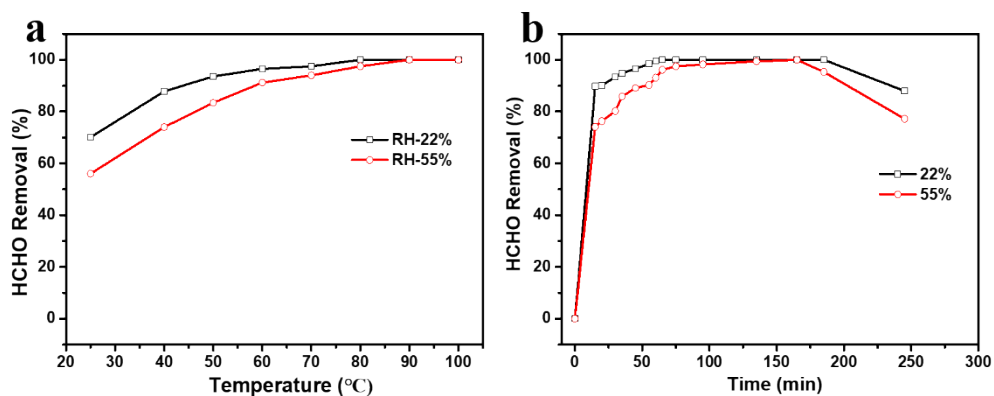

Fig. S3. (a) Effect of relative humidity (RH) on the activity of the Fe-Mn (1:1) oxide catalyst (catalyst: 50 mg, and HCHO concentration: 115 ppm, GHSV = 600 L g<sup>-1</sup> h<sup>-1</sup>, Temperature: 25-100 °C). (b) Effect of relative humidity (RH) on the stability of the Fe-Mn (1:1) oxide catalyst (catalyst: 100 mg, Temperature: 25 °C, GHSV = 300 L g<sup>-1</sup> h<sup>-1</sup>, and HCHO concentration: 115 ppm).

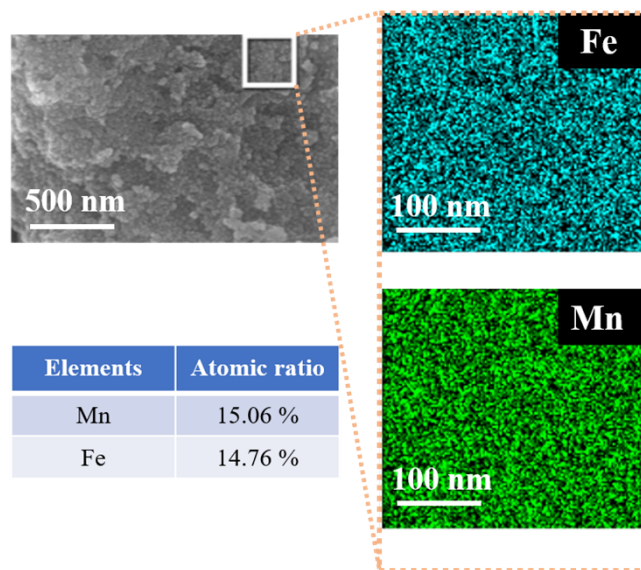

Fig. S4. The EDS-mapping of the Fe-Mn (1:1) oxide catalyst.



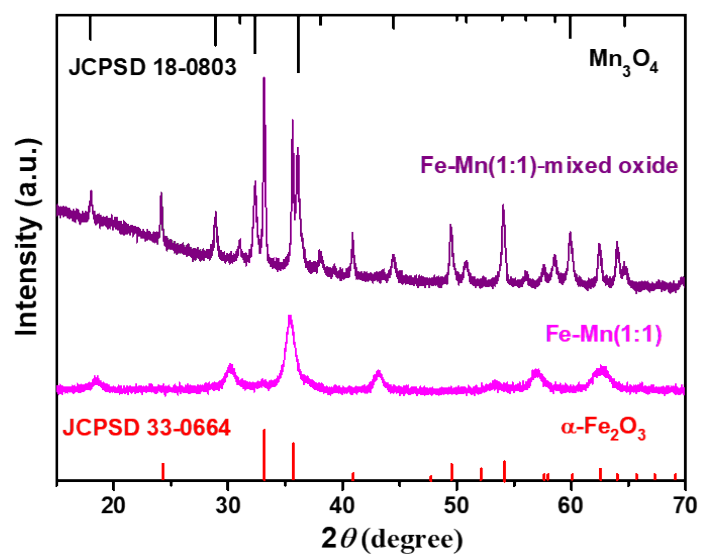

Fig. S5. XRD patterns of the Fe-Mn (1:1) ( $\text{Fe}_3\text{Mn}_3\text{O}_8$ ) and the mechanically mixed Fe-Mn (1:1) oxide catalysts.

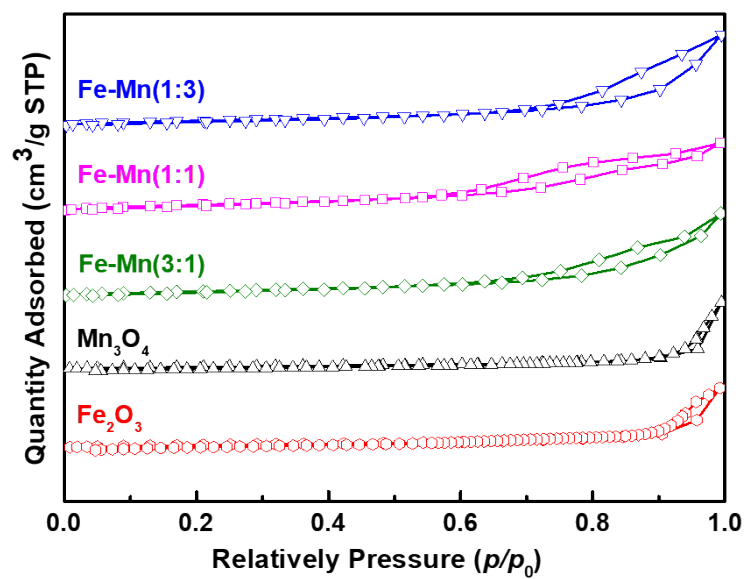

Fig. S6. Nitrogen adsorption-desorption isotherms of the Fe-Mn oxide catalysts with different Mn/Fe ratios.

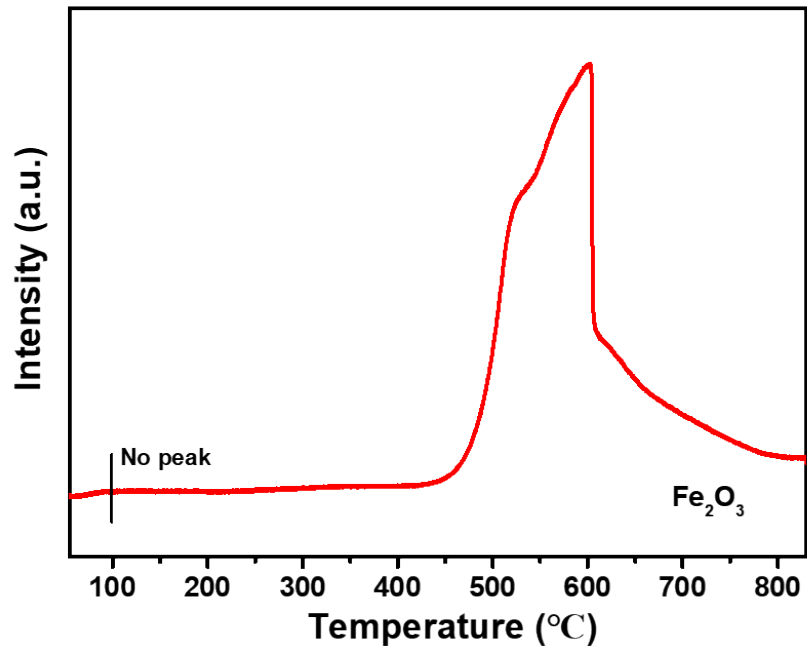

g. S7. O<sub>2</sub>-TPD profile of Fe<sub>2</sub>O<sub>3</sub>.

Fi

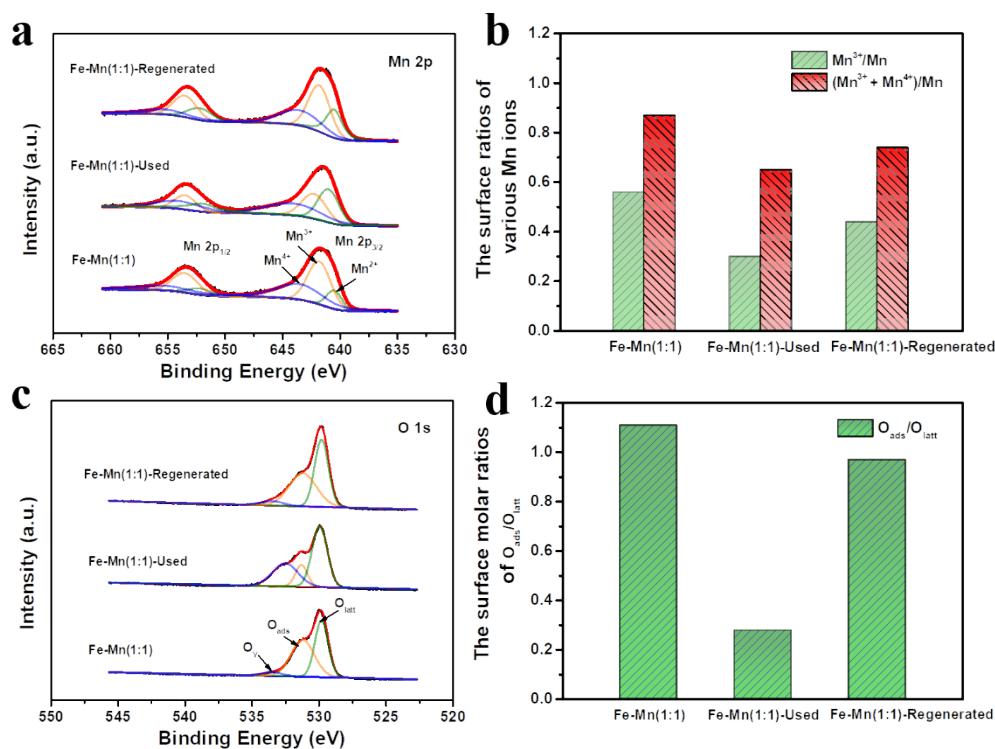

Fig. S8. (a) XPS spectra of Mn 2p for the fresh, used the regenerated Fe-Mn(1:1)-regenerated oxide catalysts. (b) Comparison of the surface molar ratios of  $Mn^{3+}/Mn$ ,  $(Mn^{3+} + Mn^{4+})/Mn$  on the surface of the respective catalysts. (c) XPS spectra of O 1s for the Fe-Mn(1:1) oxide, the Fe-Mn(1:1)-Used oxide and the Fe-Mn(1:1)-regenerated oxide catalysts. (d) Comparison of the surface molar ratios of  $O_{ads}/O_{latt}$  on the surface of the respective catalysts.

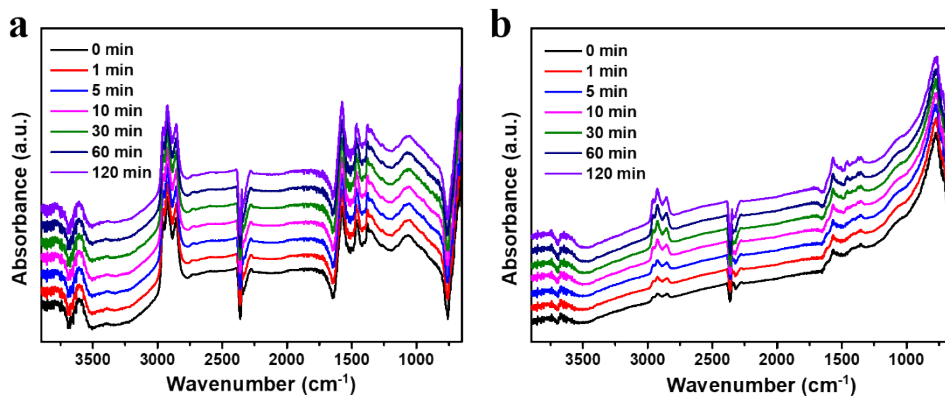

Fig. S9. (a) In situ DRIFT spectra of formaldehyde oxidation as a function of reaction time in N<sub>2</sub> atmosphere at 25 °C over the Fe-Mn(1:1) oxide catalyst. (Experimental conditions: 5 mg catalyst; HCHO concentration: 12 ppm, balanced by N<sub>2</sub>, RH=22%, GHSV = 300 L g<sup>-1</sup> h<sup>-1</sup>). (b) In situ DRIFT spectra of formaldehyde oxidation as a function of reaction time without water at 25 °C over the Fe-Mn(1:1) oxide catalysts. (Experimental conditions: 5 mg catalyst; HCHO concentration: 12 ppm, released by paraformaldehyde and balanced by air, RH=0%, GHSV = 300 L g<sup>-1</sup> h<sup>-1</sup>).

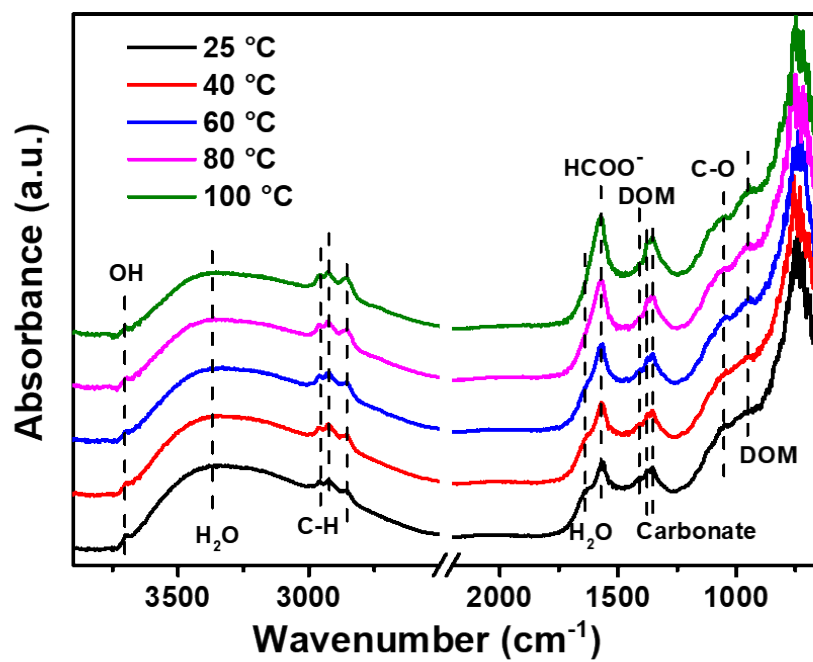

Fig. S10. In situ DRIFT spectra of formaldehyde oxidation as a function of the reaction temperature over the Fe-Mn(1:1) oxide catalyst.

Table S3 IR bands of the adsorption of HCHO on the Fe-Mn(1:1) mixed oxide catalyst.

| IR band wavenumber (cm <sup>-1</sup> ) |                           |                       |                     |                         |                        |                       |                  |                    |
|----------------------------------------|---------------------------|-----------------------|---------------------|-------------------------|------------------------|-----------------------|------------------|--------------------|
| -OH                                    | C-H                       |                       |                     | HCOO <sup>-</sup>       |                        | DOM                   |                  | Carbonates         |
| $\nu(\text{OH})$                       | $\nu_{\text{as}}$<br>(CH) | $\nu_{\text{s}}$ (CH) | $\delta(\text{CH})$ | $\nu_{\text{as}}$ (OCO) | $\nu_{\text{s}}$ (OCO) | $\delta(\text{CH}_2)$ | $\nu(\text{CO})$ | $\nu(\text{CO}_3)$ |
| ~3700                                  | ~2856                     | ~2925                 | ~2958               | ~1564                   | ~1519                  | ~1456                 | ~1047            | ~1386              |
| ~3369                                  |                           |                       |                     |                         |                        |                       |                  | ~1348              |
| Refer. 5-7                             | Refer. 5-7                |                       |                     | Refer. 5-7              |                        | Refer. 5-7            |                  | Refer. 5-7         |

## Supporting References

- 1 R. Fang, Q. Feng, H. Huang, J. Ji, M. He, Y. Zhan, B. Liu, D. Y. C. Leung, Effect of K<sup>+</sup> ions on efficient room-temperature degradation of formaldehyde over MnO<sub>2</sub> catalysts. *Catal. Today*, 2019, **327**, 154-160.
- 2 X. Wang, X. Zou, Z. Rui, Y. Wang, H. Ji, Highly dispersed and active Pd nanoparticles over titania support through engineering oxygen vacancies and their anchoring effect. *AIChEJ*, 2020, **66**, 16288.
- 3 S. Rong, P. Zhang, Y. Yang, L. Zhu, J. Wang, and F. Liu, MnO<sub>2</sub> Framework for Instantaneous Mineralization of Carcinogenic Airborne Formaldehyde at Room Temperature. *ACS Catal.* 2017, **7**, 1057-1067.
- 4 S. Huang, B. Cheng, J. Yu, and C. Jiang, Hierarchical Pt/MnO<sub>2</sub>-Ni(OH)<sub>2</sub> Hybrid Nanoflakes with Enhanced Room-Temperature Formaldehyde Oxidation Activity. *ACS Sustainable Chem. Eng.* 2018, **6**, 12481-12488.
- 5 Z. Dai, J. Zhu, J. Yan, J. Su, Y. Gao, X. Zhang, Q. Ke, G. Parsons, An Advanced Dual-Function MnO<sub>2</sub>-Fabric Air Filter Combining Catalytic Oxidation of Formaldehyde and High-Efficiency Fine Particulate Matter Removal, *Adv. Funct. Mater.*, 2020, **30**, 2001488.
- 6 Z. Yan, Z. Xu, J. Yu, Jaroniec, M. Enhanced formaldehyde oxidation on CeO<sub>2</sub>/AlOOH-supported Pt catalyst at room temperature, *Appl. Catal. B: Environ.*, 2016, **199**, 458-465.
- 7 J. Fan, X. Niu, W. Teng, P. Zhang, W. Zhang, D. Zhao, Highly dispersed Fe-Ce Mixed Oxide Catalysts Confined in Mesochannels toward Low-Temperature Oxidation Formaldehyde. *J. Mater. Chem. A*, 2020, **8**, 17174-17184.
